Table S: Average abundance and biomass of zooplankton in the Canada Basin, 2003-2006. \* indicates taxon abundance or biomass  $<0.01$ . - indicates species was not present and  $p$ -value not reported. NC means biomass not calculated.  $p$ -values from ANOVA for interannual (2005 excluded) differences with a significance level of 0.05.  $p$ -values are displayed for species that were present in two or more years. The column “year” indicates which years were significantly different if applicable
